# Supplementary material for: Enduring undetectable MRD and updated outcomes in relapsed/refractory CLL after fixed-duration venetoclax-rituximab
Source: PubMed Central journal article supplement — Blood. 2022 Aug 25;140(8):839–50. doi: 10.1182/blood.2021015014 (PMC9412011; doi:10.1182/blood.2021015014), 2022-08-25
Supplement: bloodBLD2021015014-suppl1.pdf [file bloodBLD2021015014-suppl1.pdf]

## **Enduring undetectable MRD and updated outcomes in relapsed/refractory CLL after fixed-duration venetoclax-rituximab**

John F Seymour,<sup>1</sup> Thomas J Kipps,<sup>2</sup> Barbara F Eichhorst,<sup>3</sup> James D'Rozario,<sup>4†</sup> Carolyn J Owen,<sup>5</sup> Sarit Assouline,<sup>6</sup> Nicole Lamanna,<sup>7</sup> Tadeusz Robak,<sup>8</sup> Javier de la Serna,<sup>9</sup> Ulrich Jaeger,<sup>10</sup> Guillaume Cartron,<sup>11</sup> Marco Montillo,<sup>12</sup> Clemens Mellink,<sup>13</sup> Brenda Chyla,<sup>14</sup> Anesh Panchal,<sup>15\*</sup> Tong Lu,<sup>16</sup> Jenny Q Wu,<sup>16\*</sup> Yanwen Jiang,<sup>16</sup> Marcus Lefebure,<sup>15</sup> Michelle Boyer,<sup>15</sup> and Arnon P Kater<sup>17</sup>

<sup>1</sup>Peter MacCallum Cancer Centre, Royal Melbourne Hospital and University of Melbourne, Melbourne, Australia; <sup>2</sup>UCSD Moores Cancer Center, San Diego, CA; <sup>3</sup>University of Cologne, Faculty of Medicine and University Hospital Cologne, Department I of Internal Medicine and Center of Integrated Oncology Aachen, Bonn, Cologne, Dusseldorf; Cologne, Germany; <sup>4</sup>The John Curtin School of Medical Research, Australian National University, Canberra, Australia; <sup>5</sup>University of Calgary, Calgary, AB, Canada; <sup>6</sup>Segal Cancer Centre, Lady Davis Institute, Jewish General Hospital, Montreal, QC, Canada; <sup>7</sup>Herbert Irving Comprehensive Cancer Center, Columbia University Medical Center, New York, NY; <sup>8</sup>Medical University of Lodz, Copernicus Memorial Hospital, Lodz, Poland; <sup>9</sup>Hospital Universitario 12 de Octubre, Madrid, Spain; <sup>10</sup>Dept. of Medicine I, Division of Hematology and Hemostaseology, Medical University of Vienna, Vienna, Austria; <sup>11</sup>Department of Hematology, Centre Hospitalier Universitaire de Montpellier (UMR-CNRS 5535), Montpellier, France; <sup>12</sup>Department of Hematology, 12 Hematology, Niguarda Cancer Center, ASST Grande Ospedale Metropolitano Niguarda, Milan, Italy; <sup>13</sup>Department of Human Genetics, Amsterdam University Medical Centers, University of Amsterdam,

Amsterdam, the Netherlands; <sup>14</sup>AbbVie, North Chicago, IL; <sup>15</sup>Roche Products Ltd, Welwyn Garden City, United Kingdom; <sup>16</sup>Genentech, Inc., South San Francisco, CA; and <sup>17</sup>Department of Hematology, Cancer Center Amsterdam, Lymphoma and Myeloma Center Amsterdam, Amsterdam University Medical Centers, Amsterdam, the Netherlands

\*Former employee. †Deceased.

**Correspondence:** Arnon P Kater, MD, PhD; Department of Hematology, Cancer Center Amsterdam, Lymphoma and Myeloma Center Amsterdam, Amsterdam University Medical Centers, Meibergdreef 9, 1105AZ Amsterdam, the Netherlands; Phone: +31 20 5665785; Fax: +31 20 6919743; Email: a.p.kater@amsterdamumc.nl

## **Supplementary materials**

### **Supplementary methods**

#### **MRD analysis of peripheral blood**

For minimal residual disease (MRD) in peripheral blood, results from allele-specific oligonucleotide polymerase chain reaction (ASO-PCR) and flow cytometry were combined to enable a robust dataset and a conservative approach to MRD-negativity calculation (described below) while minimizing missing data caused by the technical failure of individual methodologies noticed during the conduct of the study. The feasibility of combining the MRD results from the two methods is supported by the concordance rate of 85.4% from 1,291 pairs of post-baseline peripheral blood samples measured by both ASO-PCR and flow cytometry.

Given the overall high concordance rate between ASO-PCR and flow cytometry,<sup>29</sup> a conservative hierarchical algorithm for combining MRD results from the two assays was established to determine MRD status for each patient at each timepoint:

- Step 1. MRD positive by either ASO-PCR or flow = MRD positive
- Step 2. A sample not MRD positive by Step 1, and MRD negative by ASO-PCR and/or flow = MRD negative
- Step 3. MRD undetermined by both ASO-PCR and flow = MRD positive

In addition, patients for whom no post-baseline MRD assessment was available at a specific time point were considered "MRD positive" for that particular time point. These measures ensure a conservative approach for reporting MRD results in this study.

### **MRD doubling time analysis**

The logistic model was based on a population-based clonal growth model using longitudinal MRD assessment data post-end of treatment (EOT). The EOT MRD level below the limit of detection was simulated for each individual, based on the MRD model and the identified covariates. This model is longitudinal in nature and was developed considering both measurable and unmeasurable data, in a way that the entire MRD dynamic at, and post-EOT could be simulated numerically, including samples that were below the limit of detection. Prognostic markers and patient demographics were screened as covariates for impact on key model parameters, based on statistical and graphical assessments. Variables with >20% missing data or with low representation (<10% in any category) were excluded.

Individual MRD regrowth trajectories post-EOT were simulated based on the parameter estimates and the identified covariates from the MRD model. Doubling time was derived from the MRD regrowth trajectory for each patient, defined as the time needed to double the estimated MRD value at the first post-EOT MRD sample.

## **Supplementary results**

### **Progression-free survival (PFS) disease growth amongst patients with undetectable (u)MRD at EOT by immunoglobulin heavy chain gene (IGHV) mutation status**

Among patients with mutated IGHV disease in the venetoclax plus rituximab (VenR) arm who achieved uMRD status at EOT, only one PFS event (4.3%) was recorded, compared with 21 PFS events (37.5%) in patients with unmutated IGHV disease achieving the same landmark depth of response. The median PFS for those with unmutated IGHV disease was 39.7 months (95% confidence interval [CI]: 29.0, not evaluable [NE]). Median PFS in patients with mutated IGHV disease was not reached (NR; supplemental Figure 4A). Time to MRD relapse was similar for both mutated and unmutated IGHV groups, with a median time from EOT to MRD conversion of 22.6 months (95% CI: 8.1, NE) and 18.2 months (95% CI: 8.4, 28.0), respectively (supplemental Figure 4B). Those with mutated IGHV disease, however, demonstrated a slower rate of disease progression manifestation (by International Workshop Group on CLL [iwCLL] criteria) following MRD conversion compared with those with unmutated IGHV disease: median time to progressive disease from MRD conversion was NR among the mutated IGHV group vs 20.7 months (95% CI: 14.7, 25.6) for the unmutated IGHV group (supplemental Figure 4C).

Patients treated with VenR who are able to achieve uMRD at EOT have already demonstrated durable, long-term responses. These data indicate that this long-term PFS benefit is stratified by unmutated IGHV status, with those with mutated IGHV disease having the most durable benefit.

**Supplemental Table 1. Baseline disease characteristics by MRD response****status\* at the EOT visit in VenR-treated patients with completed 2 years of PFS**

| <b>Characteristic, n (%)</b>                             | <b>uMRD<br/>n = 83</b> | <b>Low-MRD+<br/>n = 23</b> | <b>High-MRD+<br/>n = 12</b> |
|----------------------------------------------------------|------------------------|----------------------------|-----------------------------|
| Time from first diagnosis (years),<br>n                  | 83                     | 23                         | 12                          |
| Mean (SD)                                                | 7.37 (5.34)            | 8.50 (5.00)                | 7.11 (3.85)                 |
| Median (range)                                           | 5.80 (0.5–28.4)        | 7.12 (0.8–19.7)            | 6.07 (1.4–13.9)             |
| ECOG performance status                                  | 83                     | 23                         | 12                          |
| 0                                                        | 46 (55.4)              | 18 (78.3)                  | 8 (66.7)                    |
| ≥1                                                       | 37 (44.6)              | 5 (21.7)                   | 4 (33.3)                    |
| Fludarabine-refractory <sup>†</sup>                      | 82                     | 22                         | 11                          |
| Yes                                                      | 9 (11.0)               | 2 (9.1)                    | 2 (18.2)                    |
| No                                                       | 73 (89.0)              | 20 (90.9)                  | 9 (81.8)                    |
| Creatinine clearance <sup>‡</sup>                        | 83                     | 23                         | 12                          |
| <50 mL/min                                               | 1 (1.2)                | 1 (4.3)                    | 1 (8.3)                     |
| ≥50 mL/min                                               | 82 (98.8)              | 22 (95.7)                  | 11 (91.7)                   |
| Baseline TLS risk                                        | 83                     | 23                         | 12                          |
| High                                                     | 23 (27.7)              | 3 (13.0)                   | 5 (41.7)                    |
| Medium                                                   | 46 (55.4)              | 14 (60.9)                  | 6 (50.0)                    |
| Low                                                      | 14 (16.9)              | 6 (26.1)                   | 1 (8.3)                     |
| Bulky disease (lymph nodes with<br>the largest diameter) | 76                     | 21                         | 12                          |
| <5 cm                                                    | 37 (48.7)              | 17 (81.0)                  | 7 (58.3)                    |
| ≥5 cm                                                    | 39 (51.3)              | 4 (19.0)                   | 5 (41.7)                    |
| <10 cm                                                   | 64 (84.2)              | 20 (95.2)                  | 10 (83.3)                   |
| ≥10 cm                                                   | 12 (15.8)              | 1 (4.8)                    | 2 (16.7)                    |
| Absolute lymphocyte count                                | 83                     | 23                         | 12                          |
| <25 x 10 <sup>9</sup> /L                                 | 26 (31.3)              | 6 (26.1)                   | 3 (25.0)                    |

|                                                           |           |           |          |
|-----------------------------------------------------------|-----------|-----------|----------|
| ≥25 x 10 <sup>9</sup> /L                                  | 57 (68.7) | 17 (73.9) | 9 (75.0) |
| <100 x 10 <sup>9</sup> /L                                 | 60 (72.3) | 17 (73.9) | 9 (75.0) |
| ≥100 x 10 <sup>9</sup> /L                                 | 23 (27.7) | 6 (26.1)  | 3 (25.0) |
| Presence of B-symptoms                                    | 83        | 23        | 12       |
| Fever                                                     | 1 (1.2)   | 0         | 0        |
| Night sweats                                              | 26 (31.3) | 11 (47.8) | 1 (8.3)  |
| Weight loss                                               | 4 (4.8)   | 1 (4.3)   | 0        |
| del(17p) status                                           | 58        | 19        | 9        |
| Not deleted                                               | 54 (93.1) | 18 (94.7) | 6 (66.7) |
| Deleted                                                   | 4 (6.9)   | 1 (5.3)   | 3 (33.3) |
| Stratification factor: risk status (derived) <sup>§</sup> | 83        | 23        | 12       |
| High                                                      | 49 (59.0) | 7 (30.4)  | 7 (58.3) |
| Low                                                       | 34 (41.0) | 16 (69.6) | 5 (41.7) |
| IGHV mutation status                                      | 82        | 21        | 11       |
| Mutated                                                   | 23 (28.0) | 7 (33.3)  | 3 (27.3) |
| Unmutated                                                 | 56 (68.3) | 13 (61.9) | 8 (72.7) |
| Unknown                                                   | 3 (3.7)   | 1 (4.8)   | 0        |
| TP53 mutation status                                      | 82        | 23        | 12       |
| Mutated                                                   | 13 (15.9) | 4 (17.4)  | 4 (33.3) |
| Unmutated                                                 | 69 (84.1) | 19 (82.6) | 8 (66.7) |
| Beta-2 microglobulin                                      | 81        | 23        | 11       |
| ≤3.5 mg/L                                                 | 26 (32.1) | 11 (47.8) | 6 (54.5) |
| >3.5 mg/L                                                 | 55 (67.9) | 12 (52.2) | 5 (45.5) |
| Number of prior cancer therapies                          | 83        | 23        | 12       |
| 1                                                         | 51 (61.4) | 18 (78.3) | 5 (41.7) |
| 2                                                         | 26 (31.3) | 4 (17.4)  | 3 (25.0) |
| ≥3                                                        | 6 (7.2)   | 1 (4.3)   | 4 (33.3) |

---

Note: Patients with missing results are not included in the summary.

ASO-PCR, allele-specific oligonucleotide polymerase chain reaction; del(17p), chromosome 17p deletion; ECOG, Eastern Cooperative Oncology Group; EOT, end of treatment; IGHV, immunoglobulin heavy chain gene; MRD, minimal residual disease; PFS, progression-free survival; SD, standard deviation; TLS, tumor lysis syndrome; uMRD, undetectable minimal residual disease; Ven, venetoclax; VenR, venetoclax-rituximab.

\*MRD blood response status was derived from combining ASO-PCR and flow cytometry results; †per investigator assessment. Indicating not fludarabine-refractory did not mean patients were exposed to fludarabine; ‡based on Cockcroft–Gault formula; §high-risk status was defined as having ANY of the following features: del(17p), or no response to front-line chemotherapy-containing regimen, or relapsed disease within 12 months after chemotherapy alone or within 24 months after chemoimmunotherapy. All others were considered to be of low-risk status. One patient in the VenR arm and two patients in the BR arm had an unknown or missing risk status.



**Supplemental Table 2. MRD growth model covariates: baseline variables available for covariate testing from the 211**

**included patients**

| <b>Baseline Variables</b> | <b>Definition</b>                             | <b>% of missing</b> | <b>Lowest patient number in certain category</b> | <b>Corresponding status of the category</b> | <b>Exclusion Flag 1</b> | <b>Exclusion Flag 2</b> |
|---------------------------|-----------------------------------------------|---------------------|--------------------------------------------------|---------------------------------------------|-------------------------|-------------------------|
| SCREENING                 | MRD level at screening                        | 0                   | NA                                               | NA                                          | 0                       | 0                       |
| ARM                       | Treatment arm                                 | 0                   | 91                                               | VenR                                        | 0                       | 0                       |
| IGHV                      | IGHV mutation status                          | 8.1                 | 55                                               | Mutated                                     | 0                       | 0                       |
| P17/ <i>TP53</i>          | del(17p)/ <i>TP53</i> mutation status         | 1.4                 | 51                                               | Mutated                                     | 0                       | 0                       |
| AGE                       | Age                                           | 0                   | NA                                               | NA                                          | 0                       | 0                       |
| SEX                       | Gender                                        | 0                   | 55                                               | Female                                      | 0                       | 0                       |
| BWT                       | Body weight                                   | 0.5                 | NA                                               | NA                                          | 0                       | 0                       |
| ATM                       | <i>ATM</i> mutation status                    | 32.2                | 36                                               | Mutated                                     | 0                       | 1                       |
| BIRC3                     | <i>BIRC3</i> mutation status                  | 32.3                | 7                                                | Mutated                                     | 1                       | 1                       |
| NFKBIE                    | <i>NFKBIE</i> mutation status                 | 32.2                | 12                                               | Mutated                                     | 1                       | 1                       |
| NOTCH1                    | <i>NOTCH1</i> mutation status                 | 32.2                | 31                                               | Mutated                                     | 0                       | 1                       |
| <i>TP53</i>               | <i>TP53</i> mutation status                   | 3.3                 | 40                                               | Mutated                                     | 0                       | 0                       |
| SF3B1                     | <i>SF3B1</i> gene mutation                    | 32.2                | 23                                               | Mutated                                     | 0                       | 1                       |
| XPO1                      | <i>XPO1</i> mutation                          | 32.2                | 22                                               | Mutated                                     | 0                       | 1                       |
| COMP3                     | Complex karyotype with $\geq 3$ abnormalities | 24.6                | 45                                               | Abnormal                                    | 0                       | 1                       |
| COMP5                     | Complex karyotype with $\geq 5$ abnormalities | 24.6                | 12                                               | Abnormal                                    | 1                       | 1                       |
| aCGH17p13                 | deletion of 17p13 by aCGH                     | 24.6                | 15                                               | Mutated                                     | 1                       | 1                       |
| FISH17p                   | deletion of 17p by FISH                       | 0                   | 34                                               | Mutated                                     | 0                       | 0                       |
| CH11QDLC                  | Chromosome 11q deletion                       | 9.5                 | 67                                               | Abnormal                                    | 0                       | 0                       |
| CH12TRIC                  | Trisomy 12                                    | 9.5                 | 35                                               | Abnormal                                    | 0                       | 0                       |
| MS13QDLC                  | Monosomy 13q deletion                         | 9.5                 | 52                                               | Abnormal                                    | 0                       | 0                       |

|          |                                                         |     |    |                           |   |   |
|----------|---------------------------------------------------------|-----|----|---------------------------|---|---|
| NS13QDLC | Nullisomy 13q deletion                                  | 9.5 | 65 | Abnormal                  | 0 | 0 |
| CH13QDLC | Chromosome 13q deletion                                 | 9.5 | 40 | Abnormal                  | 0 | 0 |
| RSP      | Responder (PR/CR) or non-responder (PD/SD) to treatment | 0.5 | 28 | Responder                 | 0 | 0 |
| TLS      | Tumor lysis syndrome risk category                      | 0   | 60 | High risk                 | 0 | 0 |
| CLLPRLN  | Prior line of CLL therapy category                      | 0   | 75 | ≥2 prior lines of therapy | 0 | 0 |

Exclusion Flag 1 was set to 1 if the lowest number of patients in a certain category for a binary outcome was lower than or equal to 10% of the study population, which was 21 patients; Exclusion Flag 2 was set to 1 if the missing data exceeded 20%; The covariate screening used the variables with Exclusion Flag 1 & 2 = 0. "Lowest patient number in certain Category" and "Corresponding Status of the Category" were set to NA for the continuous covariates; TLS risk category and CLLPRLN were dichotomized into binary variables before the analysis.

aCGH, array comparative genomic hybridization; ATM, ataxia telangiectasia mutated; CLL, chronic lymphocytic leukemia; CR, complete response; del(17p), chromosome 17p deletion; FISH, fluorescence in situ hybridization; IGHV, immunoglobulin heavy chain gene; MRD, minimal residual disease; NA, not applicable; PD, progressive disease; PR, partial response; SD, stable disease; VenR, venetoclax-rituximab.

**Supplemental Table 3. Multivariate Cox analysis for PFS among the patients who 2 years of Ven therapy without PD and who had a valid MRD assessment at EOT (n = 118)**

| Effect/covariate included in the model             | Degrees of freedom | Parameter estimate (standard error) | HR (95% CI)       | P value* |
|----------------------------------------------------|--------------------|-------------------------------------|-------------------|----------|
| MRD status at EOT<br>(reference: positive, n = 35) |                    |                                     |                   |          |
| Negative, n = 83                                   | 1                  | -1.59197 (0.310)                    | 0.20 (0.11, 0.37) | < .0001  |
| Age at screening<br>(reference: <65 years, n = 60) |                    |                                     |                   |          |
| ≥65 years, n = 58                                  | 1                  | -0.40333 (0.327)                    | 0.67 (0.35, 1.27) | .2181    |
| Baseline IGHV<br>(reference: unmut, n = 77)        |                    |                                     |                   |          |
| Mut, n = 33                                        | 1                  | -1.49031 (0.546)                    | 0.23 (0.08, 0.66) | .0063    |
| Other*, n = 8                                      | 1                  | -0.45325 (0.544)                    | 0.64 (0.22, 1.84) | .4045    |
| TLS risk at screening<br>(reference: high, n = 31) |                    |                                     |                   |          |
| Low/medium, n = 87                                 | 1                  | -0.46762 (0.326)                    | 0.63 (0.33, 1.19) | .1518    |
| TP53 (reference: mut, n = 21)                      |                    |                                     |                   |          |
| Unmut, n = 96                                      | 1                  | -0.46358 (0.347)                    | 0.63 (0.32, 1.24) | .1819    |
| Other*, n = 1                                      | 0                  | 0.00000 (NE)                        | NE (NE, NE)       | NE       |

Grade 3–4 AEs with ≥2% difference in incidence rate between treatment arms within the safety evaluable population are shown. Treatment-emergent AEs and AEs reported in the post-treatment period are included. Multiple occurrences of the same AE in an individual are counted only once on individual rows.

AE, adverse event; CI, confidence interval; EOT, end of treatment; HR, hazard ratio; IGHV, immunoglobulin heavy chain gene; TLS, tumor lysis syndrome; MRD, minimal residual disease; mut, mutated; NE, not estimable; PD, progressive disease; PFS, progression-free survival; unmut, Unmutated; ven, venetoclax.

\*Missing/unknown/undetermined.

**Supplemental Table 4. ORR\* to subsequent BTKi-based therapy or Ven-based therapy in evaluable patients with PD following initial treatment in MURANO.**

|                                                                     | <b>VenR arm<br/>(n = 67)</b> | <b>BR arm<br/>(n = 123)</b> |
|---------------------------------------------------------------------|------------------------------|-----------------------------|
| <b><i>Response to Ven-based subsequent therapy<sup>†</sup></i></b>  |                              |                             |
| <b>Evaluable patients overall</b>                                   | <b>n = 18</b>                | <b>n = 10</b>               |
| Best ORR                                                            | 13 (72.2)                    | 8 (80.0)                    |
| CR/CRi                                                              | 1 (5.6)                      | 3 (30.0)                    |
| PR/nPR                                                              | 12 (66.7)                    | 5 (50.0)                    |
| SD                                                                  | 1 (5.6)                      | 1 (10.0)                    |
| PD                                                                  | 2 (11.1)                     | 1 (10.0)                    |
| Non-responder                                                       | 2 (11.1)                     | 0                           |
| <b>Patients with unmut-IGHV<sup>‡</sup></b>                         | <b>n = 17</b>                | <b>n = 4</b>                |
| ORR                                                                 | 12 (70.6)                    | 4 (100)                     |
| CR                                                                  | 1 (5.9)                      | 1 (25.0)                    |
| PR/nPR                                                              | 11 (64.7)                    | 3 (75.0)                    |
| <b>Patients with mut-IGHV<sup>‡</sup></b>                           | <b>n = 0</b>                 | <b>n = 3</b>                |
| ORR                                                                 | NA                           | 1 (33.3)                    |
| CR                                                                  | NA                           | 0                           |
| PR/nPR                                                              | NA                           | 1 (33.3)                    |
| <b><i>Response to BTKi-based subsequent therapy<sup>§</sup></i></b> |                              |                             |
|                                                                     | <b>n = 14</b>                | <b>n = 56</b>               |
| Best ORR                                                            | 14 (100)                     | 47 (83.9)                   |
| CR/CRi                                                              | 1 (7.1)                      | 9 (16.1)                    |
| PR/nPR                                                              | 13 (92.9)                    | 38 (67.9)                   |
| SD                                                                  | 0                            | 5 (10.7)                    |
| PD                                                                  | 0                            | 3 (5.4)                     |
| <b>Patients with unmut-IGHV<sup>¶</sup></b>                         | <b>n = 8</b>                 | <b>n = 41</b>               |
| ORR                                                                 | 8 (100)                      | 33 (80.5)                   |
| CR                                                                  | 0                            | 7 (17.1)                    |
| PR/nPR                                                              | 8 (100)                      | 26 (63.4)                   |
| <b>Patients with mut-IGHV<sup>¶</sup></b>                           | <b>n = 4</b>                 | <b>n = 10</b>               |
| ORR                                                                 | 4 (100)                      | 90 (90.0)                   |
| CR                                                                  | 1 (25.0)                     | 2 (20.0)                    |
| PR/nPR                                                              | 3 (75.0)                     | 7 (70.0)                    |

Values are n (%)

\*Best ORR, median treatment duration and number of patients remaining on therapy were calculated among patients with evaluable responses; responses were classed as evaluable if they were reported by the investigators prior to discontinuation or initiation of subsequent line of therapy. Responses in patients who were treated with their next line of therapy for insufficient time to have their response assessed, or those patients who had no response assessments reported, were considered unevaluable; <sup>†</sup>Median (range) treatment duration 11.4 (0.7–37.6) months in the VenR arm and 13.5

(0.2–30.7) months in the BR arm; †IGHV status not available for 1 patient (nPR) in the VenR arm and 3 patients in the BR arm (2 CR and 1 PR); §Median (range) treatment duration 21.9 (5.6–59.2) months in the VenR arm and 26.6 (0–50.4) months in the BR arm; ¶IGHV status not available for 2 patients in the VenR arm (2 PR) and 5 patients in the BR arm (5 PR).

CR, complete response; CRi, complete response with incomplete bone marrow recovery; PR, partial response; nPR, nodular partial response; SD, stable disease.

**Supplemental Table 5. Overview of safety data from the MURANO trial for both study arms (clinical cutoff date: May 8, 2020)**

| <b>AE, n (%)</b>                | <b>VenR<br/>n = 194</b> | <b>BR<br/>n = 188</b> |
|---------------------------------|-------------------------|-----------------------|
| Grade 3–4 AEs                   |                         |                       |
| Neutropenia                     | 115 (59.3)              | 76 (40.4)             |
| Anemia                          | 21 (10.8)               | 26 (13.8)             |
| Thrombocytopenia                | 12 (6.2)                | 19 (10.1)             |
| Febrile neutropenia             | 7 (3.6)                 | 18 (9.6)              |
| Pneumonia                       | 10 (5.2)                | 15 (8.0)              |
| Infusion-related reaction       | 4 (2.1)                 | 10 (5.3)              |
| Tumor lysis syndrome*           | 6 (3.1)                 | 2 (1.1)               |
| Hyperglycemia                   | 4 (2.1)                 | 0                     |
| Hypotension                     | 0                       | 5 (2.7)               |
| Hypogammaglobulinemia           | 4 (2.1)                 | 0                     |
| Richter's transformation        | 7 (3.6)                 | 6 (3.2)               |
| Second primary malignancies†    | 30 (15.5)               | 24 (12.8)             |
| Basal cell carcinoma            | 9 (4.6)                 | 5 (2.7)               |
| Squamous cell carcinoma of skin | 8 (4.1)                 | 2 (1.1)               |
| Squamous cell carcinoma         | 2 (1.0)                 | 4 (2.1)               |
| Myelodysplastic syndrome        | 3 (1.5)                 | 1 (0.5)               |
| Metastatic malignant melanoma   | 2 (1.0)                 | 1 (0.5)               |
| Malignant melanoma              | 1 (0.5)                 | 1 (0.5)               |
| Acute myeloid leukemia          | 1 (0.5)                 | 1 (0.5)               |
| Colorectal cancer               | 2 (1.0)                 | 0                     |
| Adenocarcinoma of colon         | 0                       | 1 (0.5)               |

|                                        |         |         |
|----------------------------------------|---------|---------|
| Colorectal adenocarcinoma              | 0       | 1 (0.5) |
| Colon cancer                           | 1 (0.5) | 0       |
| Lung neoplasm malignant                | 0       | 2 (1.1) |
| Prostate cancer                        | 1 (0.5) | 1 (0.5) |
| Adenocarcinoma gastric                 | 1 (0.5) | 0       |
| Breast cancer                          | 1 (0.5) | 0       |
| Keratoacanthoma                        | 1 (0.5) | 0       |
| Lung adenocarcinoma stage III          | 1 (0.5) | 0       |
| Lymphoma                               | 0       | 1 (0.5) |
| Medullary thyroid cancer               | 0       | 1 (0.5) |
| Metastases to lung                     | 0       | 1 (0.5) |
| Metastasis                             | 1 (0.5) | 0       |
| Pancreatic carcinoma                   | 1 (0.5) | 0       |
| Plasma cell myeloma                    | 1 (0.5) | 0       |
| Skin squamous cell carcinoma recurrent | 0       | 1 (0.5) |
| Transitional cell carcinoma            | 0       | 1 (0.5) |

---

Grade 3–4 AEs with  $\geq 2\%$  difference in incidence rate between treatment arms within the safety evaluable population are shown. Treatment-emergent AEs and AEs reported in the post-treatment period are included. Multiple occurrences of the same AE in an individual are counted only once on individual rows.

AE, adverse event; BR, bendamustine-rituximab; TLS, tumor lysis syndrome; VenR, venetoclax-rituximab.

\*Laboratory-confirmed TLS; †any grade reported.

**Supplemental Figure 1. Patient disposition through the study and 5-year follow-up.**

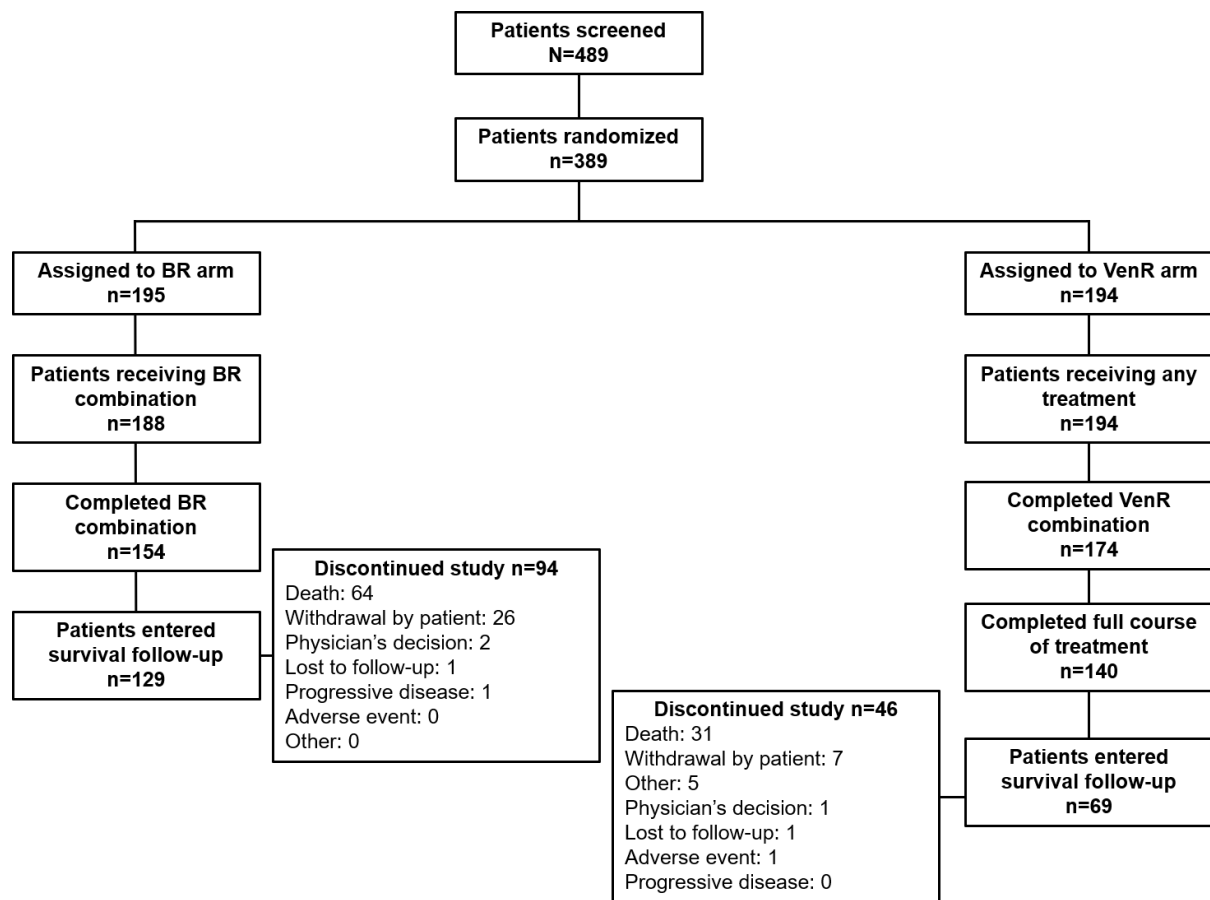

BR, bendamustine-rituximab; VenR, venetoclax-rituximab.



**Supplemental Figure 2. Forest plots for investigator-assessed PFS subgroup analyses: demographics; stratification factors; biomarkers; and baseline characteristics.**

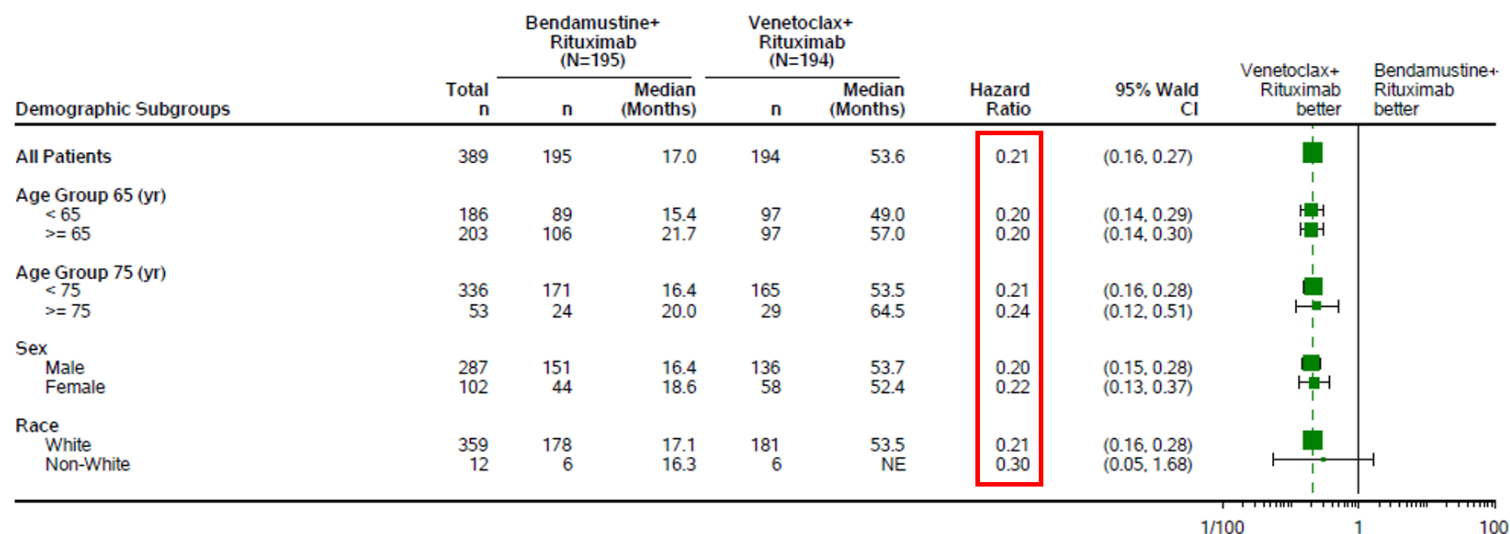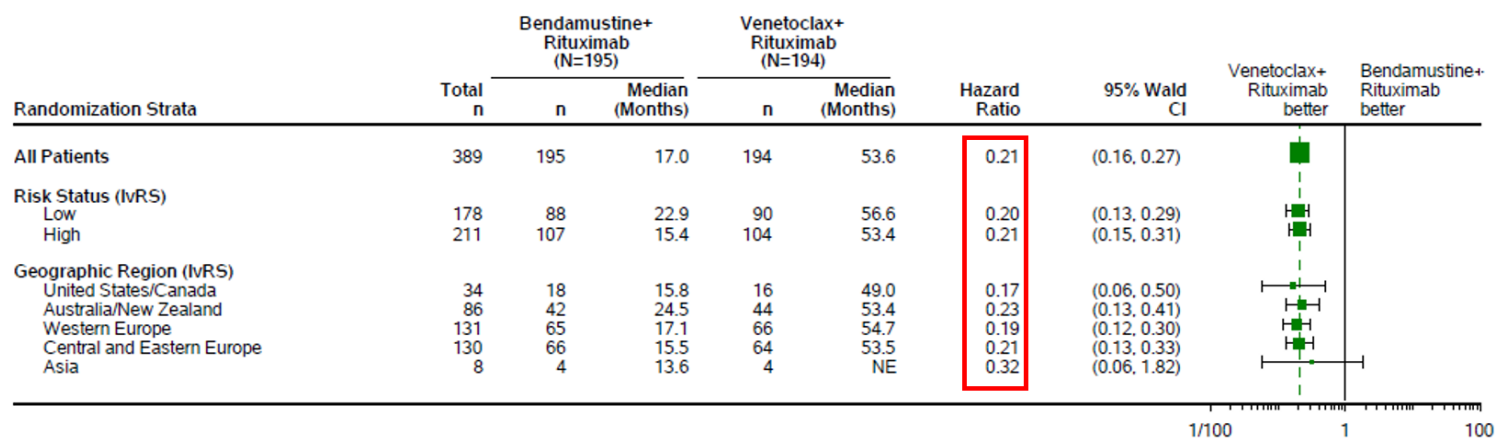

| Biomarker                                  | Total<br>n | Bendamustine+<br>Rituximab<br>(N=195) |                    | Venetoclax+<br>Rituximab<br>(N=194) |                    | Hazard<br>Ratio | 95% Wald<br>CI | Venetoclax+<br>Rituximab<br>better | Bendamustine+<br>Rituximab<br>better |
|--------------------------------------------|------------|---------------------------------------|--------------------|-------------------------------------|--------------------|-----------------|----------------|------------------------------------|--------------------------------------|
|                                            |            | n                                     | Median<br>(Months) | n                                   | Median<br>(Months) |                 |                |                                    |                                      |
| All Patients                               | 389        | 195                                   | 17.0               | 194                                 | 53.6               | 0.21            | (0.16, 0.27)   |                                    |                                      |
| Chromosome 17p Deletion (by aCGH)          |            |                                       |                    |                                     |                    |                 |                |                                    |                                      |
| Normal                                     | 249        | 124                                   | 19.6               | 125                                 | 56.6               | 0.17            | (0.12, 0.24)   |                                    |                                      |
| Abnormal                                   | 39         | 22                                    | 7.8                | 17                                  | 29.5               | 0.18            | (0.07, 0.48)   |                                    |                                      |
| Chromosome 11q Deletion                    |            |                                       |                    |                                     |                    |                 |                |                                    |                                      |
| Normal                                     | 217        | 105                                   | 22.1               | 112                                 | 53.7               | 0.24            | (0.17, 0.34)   |                                    |                                      |
| Abnormal                                   | 125        | 64                                    | 15.7               | 61                                  | 53.8               | 0.16            | (0.10, 0.26)   |                                    |                                      |
| p53 Mutation                               |            |                                       |                    |                                     |                    |                 |                |                                    |                                      |
| Unmutated                                  | 276        | 132                                   | 20.5               | 144                                 | 54.7               | 0.18            | (0.13, 0.24)   |                                    |                                      |
| Mutated                                    | 99         | 51                                    | 12.9               | 48                                  | 37.4               | 0.26            | (0.16, 0.43)   |                                    |                                      |
| Baseline IgVH Mutation Status              |            |                                       |                    |                                     |                    |                 |                |                                    |                                      |
| Mutated                                    | 104        | 51                                    | 24.2               | 53                                  | NE                 | 0.14            | (0.07, 0.26)   |                                    |                                      |
| Unmutated                                  | 246        | 123                                   | 15.7               | 123                                 | 52.2               | 0.19            | (0.13, 0.26)   |                                    |                                      |
| Baseline Beta-2 Microglobulin              |            |                                       |                    |                                     |                    |                 |                |                                    |                                      |
| ≤ 3.5 mg/L                                 | 123        | 59                                    | 16.3               | 64                                  | NE                 | 0.17            | (0.11, 0.28)   |                                    |                                      |
| > 3.5 mg/L                                 | 252        | 127                                   | 18.7               | 125                                 | 53.4               | 0.24            | (0.18, 0.34)   |                                    |                                      |
| p53 Mutation and/or 17p Deletion (by aCGH) |            |                                       |                    |                                     |                    |                 |                |                                    |                                      |
| Unmutated                                  | 202        | 98                                    | 19.6               | 104                                 | 56.6               | 0.17            | (0.11, 0.25)   |                                    |                                      |
| Mutated                                    | 108        | 55                                    | 13.4               | 53                                  | 37.4               | 0.26            | (0.16, 0.42)   |                                    |                                      |

1/100 1 100

| Baseline Characteristics                              | Total<br>n | Bendamustine+<br>Rituximab<br>(N=195) |                    | Venetoclax+<br>Rituximab<br>(N=194) |                    | Hazard<br>Ratio | 95% Wald<br>CI | Venetoclax+<br>Rituximab<br>better | Bendamustine+<br>Rituximab<br>better |
|-------------------------------------------------------|------------|---------------------------------------|--------------------|-------------------------------------|--------------------|-----------------|----------------|------------------------------------|--------------------------------------|
|                                                       |            | n                                     | Median<br>(Months) | n                                   | Median<br>(Months) |                 |                |                                    |                                      |
| All Patients                                          | 389        | 195                                   | 17.0               | 194                                 | 53.6               | 0.21            | (0.16, 0.27)   |                                    |                                      |
| Renal Impairment Status                               |            |                                       |                    |                                     |                    |                 |                |                                    |                                      |
| Normal                                                | 157        | 78                                    | 14.2               | 79                                  | 53.0               | 0.20            | (0.13, 0.30)   |                                    |                                      |
| Mild                                                  | 184        | 90                                    | 21.0               | 94                                  | 54.7               | 0.20            | (0.13, 0.29)   |                                    |                                      |
| Moderate                                              | 48         | 27                                    | 20.5               | 21                                  | 44.3               | 0.33            | (0.16, 0.67)   |                                    |                                      |
| Hepatic Impairment Status                             |            |                                       |                    |                                     |                    |                 |                |                                    |                                      |
| Normal                                                | 296        | 150                                   | 16.6               | 146                                 | 53.4               | 0.18            | (0.13, 0.25)   |                                    |                                      |
| Mild                                                  | 74         | 37                                    | 17.1               | 37                                  | 53.8               | 0.28            | (0.15, 0.52)   |                                    |                                      |
| Moderate                                              | 18         | 7                                     | 15.4               | 11                                  | NE                 | 0.21            | (0.05, 0.86)   |                                    |                                      |
| Severe                                                | 1          | 1                                     | 33.9               |                                     |                    | NE              | (NE, NE)       |                                    |                                      |
| Rai Stage                                             |            |                                       |                    |                                     |                    |                 |                |                                    |                                      |
| Stage 0                                               | 82         | 39                                    | 19.5               | 43                                  | NE                 | 0.20            | (0.11, 0.37)   |                                    |                                      |
| Stage 1                                               | 107        | 59                                    | 15.5               | 48                                  | 56.6               | 0.13            | (0.07, 0.23)   |                                    |                                      |
| Stage 2                                               | 104        | 56                                    | 21.2               | 48                                  | 53.5               | 0.19            | (0.11, 0.33)   |                                    |                                      |
| Stage 3                                               | 45         | 22                                    | 24.2               | 23                                  | 53.7               | 0.30            | (0.14, 0.65)   |                                    |                                      |
| Stage 4                                               | 51         | 19                                    | 14.1               | 32                                  | 44.6               | 0.32            | (0.16, 0.64)   |                                    |                                      |
| Bulky Disease (Lymph Nodes with the Largest Diameter) |            |                                       |                    |                                     |                    |                 |                |                                    |                                      |
| < 5 cm                                                | 197        | 97                                    | 16.6               | 100                                 | 53.8               | 0.21            | (0.14, 0.30)   |                                    |                                      |
| >= 5 cm                                               | 172        | 88                                    | 15.8               | 84                                  | 48.4               | 0.19            | (0.13, 0.29)   |                                    |                                      |
| Bulky Disease (Lymph Nodes with the Largest Diameter) |            |                                       |                    |                                     |                    |                 |                |                                    |                                      |
| < 10 cm                                               | 319        | 158                                   | 17.0               | 161                                 | 53.6               | 0.20            | (0.15, 0.27)   |                                    |                                      |
| >= 10 cm                                              | 50         | 27                                    | 13.5               | 23                                  | 41.7               | 0.22            | (0.10, 0.46)   |                                    |                                      |
| Number of Prior Regimens                              |            |                                       |                    |                                     |                    |                 |                |                                    |                                      |
| 1                                                     | 228        | 117                                   | 16.4               | 111                                 | 54.0               | 0.18            | (0.13, 0.26)   |                                    |                                      |
| 2                                                     | 101        | 43                                    | 21.2               | 58                                  | 53.5               | 0.27            | (0.16, 0.45)   |                                    |                                      |
| >=3                                                   | 60         | 35                                    | 12.9               | 25                                  | 48.5               | 0.22            | (0.10, 0.47)   |                                    |                                      |
| Number of Prior Regimens                              |            |                                       |                    |                                     |                    |                 |                |                                    |                                      |
| 1                                                     | 228        | 117                                   | 16.4               | 111                                 | 54.0               | 0.18            | (0.13, 0.26)   |                                    |                                      |
| > 1                                                   | 161        | 78                                    | 18.6               | 83                                  | 53.1               | 0.25            | (0.17, 0.38)   |                                    |                                      |
| Refractory vs. Relapse to Most Recent Prior Therapy   |            |                                       |                    |                                     |                    |                 |                |                                    |                                      |
| Refractory                                            | 59         | 29                                    | 13.6               | 30                                  | 31.9               | 0.34            | (0.17, 0.66)   |                                    |                                      |
| Relapse                                               | 330        | 166                                   | 18.6               | 164                                 | 53.8               | 0.19            | (0.14, 0.25)   |                                    |                                      |
| Response Duration to Most Recent Prior Therapy        |            |                                       |                    |                                     |                    |                 |                |                                    |                                      |
| < 12 Months                                           | 92         | 43                                    | 15.8               | 49                                  | 53.5               | 0.18            | (0.10, 0.31)   |                                    |                                      |
| >= 12 Months                                          | 238        | 123                                   | 19.6               | 115                                 | 54.0               | 0.19            | (0.14, 0.27)   |                                    |                                      |
| p53 Mutation High Low Clone                           |            |                                       |                    |                                     |                    |                 |                |                                    |                                      |
| High Clone (> 20%)                                    | 66         | 36                                    | 11.1               | 30                                  | 36.0               | 0.31            | (0.17, 0.56)   |                                    |                                      |
| Low Clone (5% to <= 20%)                              | 33         | 15                                    | 15.2               | 18                                  | 47.9               | 0.21            | (0.08, 0.53)   |                                    |                                      |
| Unmutated                                             | 276        | 132                                   | 20.5               | 144                                 | 54.7               | 0.18            | (0.13, 0.24)   |                                    |                                      |

aCGH, array comparative genomic hybridization; CI, confidence interval; IgHV, immunoglobulin heavy chain gene; IvRS, interactive voice response system; NE, not estimable; PFS, progression-free survival; yr, year.

**Supplemental Figure 3. Kaplan–Meier estimates of TTNT in the overall intent-to-treat population.**

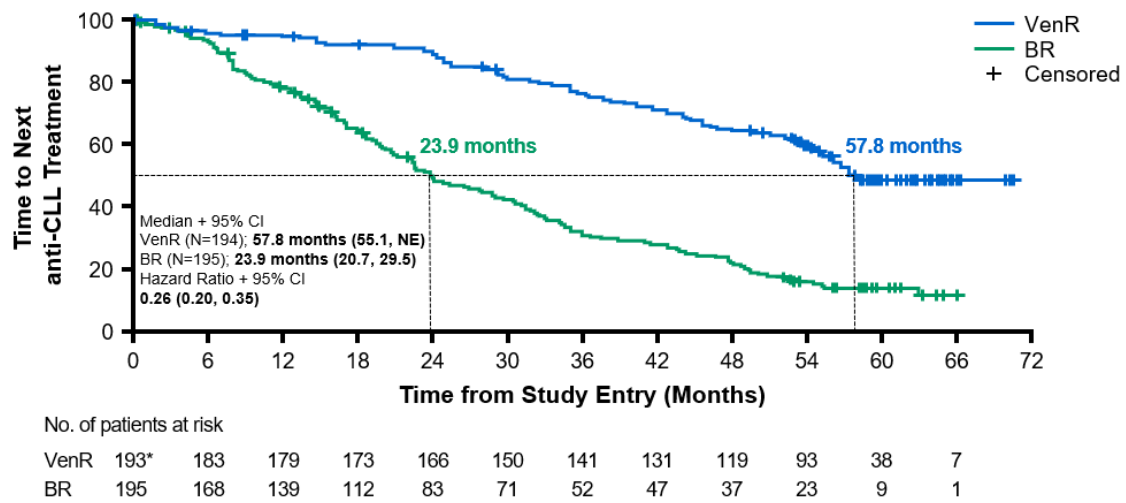

TTNT is defined as time from initiation of BR or VenR to next anti-CLL treatment, or death (whichever occurs first).<sup>†1</sup> 1 patient omitted due to invalid date for commencement of follow-up therapy. BR, bendamustine-rituximab; CI, confidence interval; CLL, chronic lymphocytic leukemia; NE, not estimable; TTNT, time to next treatment; VenR, venetoclax-rituximab.

**Supplemental Figure 4. Forest plots for OS subgroup analyses: demographic; stratification factors; biomarkers; and baseline characteristics.**

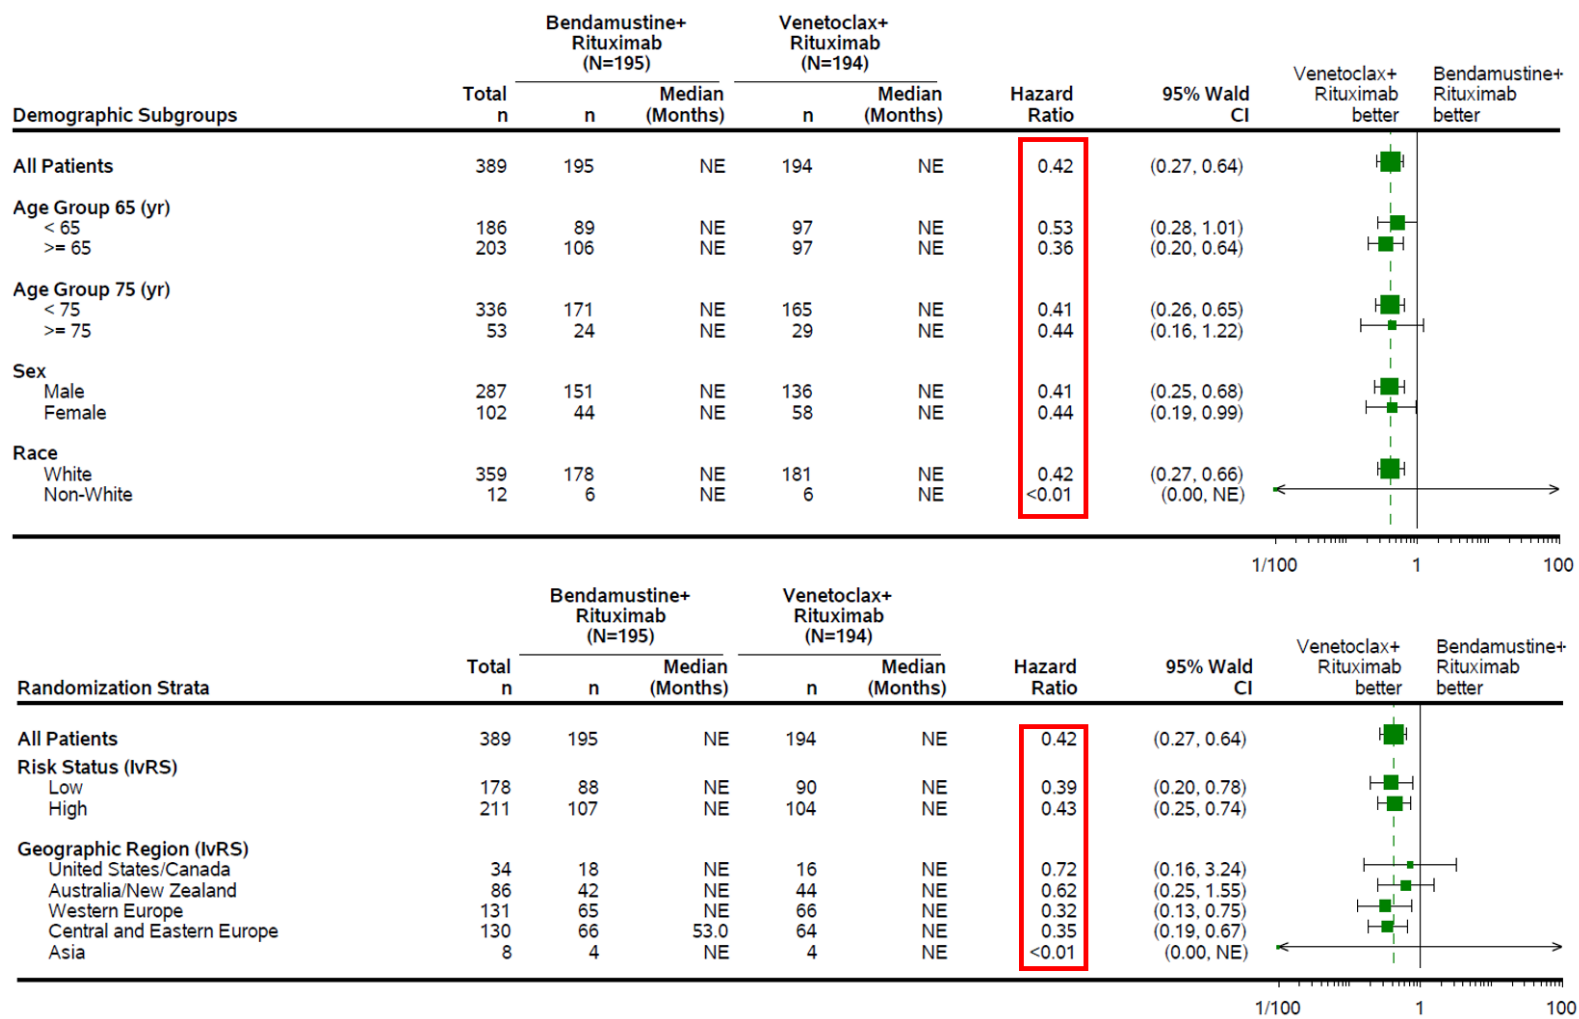

| Biomarker                                  | Total<br>n | Bendamustine+<br>Rituximab<br>(N=195) |                    | Venetoclax+<br>Rituximab<br>(N=194) |                    | Hazard<br>Ratio | 95% Wald<br>CI | Venetoclax+<br>Rituximab<br>better | Bendamustine+<br>Rituximab<br>better |
|--------------------------------------------|------------|---------------------------------------|--------------------|-------------------------------------|--------------------|-----------------|----------------|------------------------------------|--------------------------------------|
|                                            |            | n                                     | Median<br>(Months) | n                                   | Median<br>(Months) |                 |                |                                    |                                      |
| All Patients                               | 389        | 195                                   | NE                 | 194                                 | NE                 | 0.42            | (0.27, 0.64)   |                                    |                                      |
| Chromosome 17p Deletion (by aCGH)          |            |                                       |                    |                                     |                    |                 |                |                                    |                                      |
| Normal                                     | 249        | 124                                   | NE                 | 125                                 | NE                 | 0.24            | (0.13, 0.45)   |                                    |                                      |
| Abnormal                                   | 39         | 22                                    | NE                 | 17                                  | 58.5               | 2.02            | (0.61, 6.74)   |                                    |                                      |
| Chromosome 11q Deletion                    |            |                                       |                    |                                     |                    |                 |                |                                    |                                      |
| Normal                                     | 217        | 105                                   | NE                 | 112                                 | NE                 | 0.57            | (0.34, 0.98)   |                                    |                                      |
| Abnormal                                   | 125        | 64                                    | NE                 | 61                                  | NE                 | 0.14            | (0.05, 0.41)   |                                    |                                      |
| p53 Mutation                               |            |                                       |                    |                                     |                    |                 |                |                                    |                                      |
| Unmutated                                  | 276        | 132                                   | NE                 | 144                                 | NE                 | 0.33            | (0.19, 0.57)   |                                    |                                      |
| Mutated                                    | 99         | 51                                    | NE                 | 48                                  | NE                 | 0.57            | (0.27, 1.20)   |                                    |                                      |
| Baseline IgVH Mutation Status              |            |                                       |                    |                                     |                    |                 |                |                                    |                                      |
| Mutated                                    | 104        | 51                                    | NE                 | 53                                  | NE                 | 0.21            | (0.07, 0.62)   |                                    |                                      |
| Unmutated                                  | 246        | 123                                   | NE                 | 123                                 | NE                 | 0.45            | (0.27, 0.76)   |                                    |                                      |
| Baseline Beta-2 Microglobulin              |            |                                       |                    |                                     |                    |                 |                |                                    |                                      |
| ≤ 3.5 mg/L                                 | 123        | 59                                    | NE                 | 64                                  | NE                 | 0.41            | (0.18, 0.94)   |                                    |                                      |
| > 3.5 mg/L                                 | 252        | 127                                   | NE                 | 125                                 | NE                 | 0.43            | (0.26, 0.71)   |                                    |                                      |
| p53 Mutation and/or 17p Deletion (by aCGH) |            |                                       |                    |                                     |                    |                 |                |                                    |                                      |
| Unmutated                                  | 202        | 98                                    | NE                 | 104                                 | NE                 | 0.25            | (0.13, 0.50)   |                                    |                                      |
| Mutated                                    | 108        | 55                                    | NE                 | 53                                  | NE                 | 0.66            | (0.32, 1.34)   |                                    |                                      |

1/100 1 100

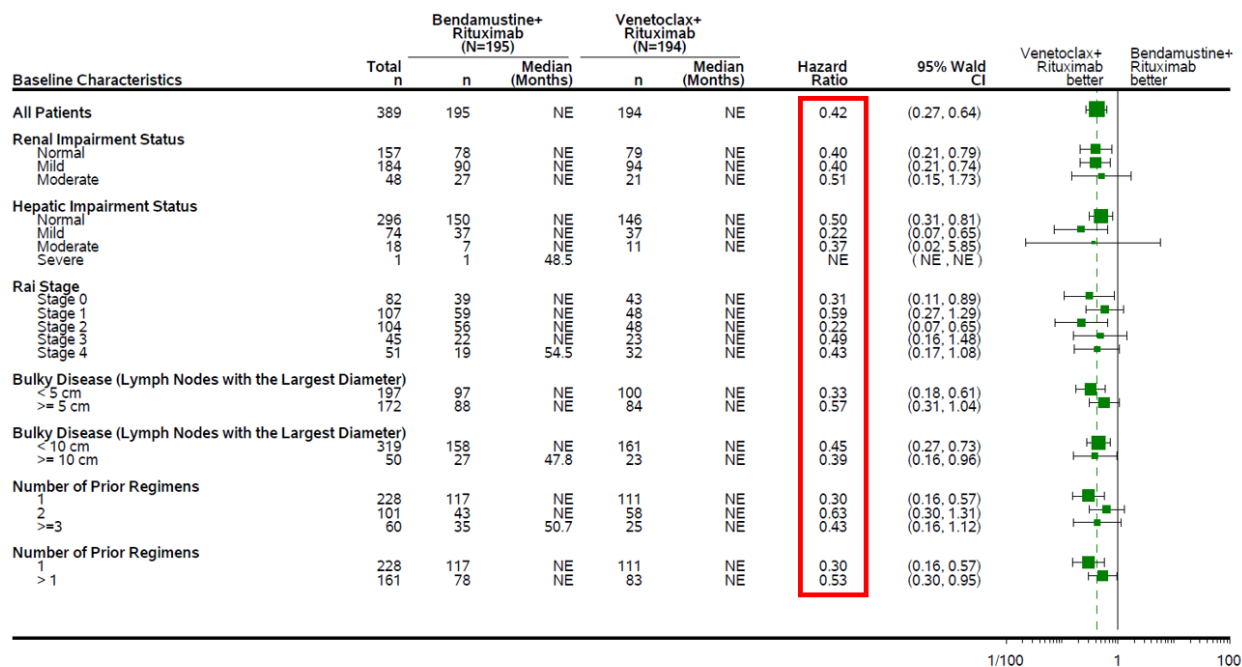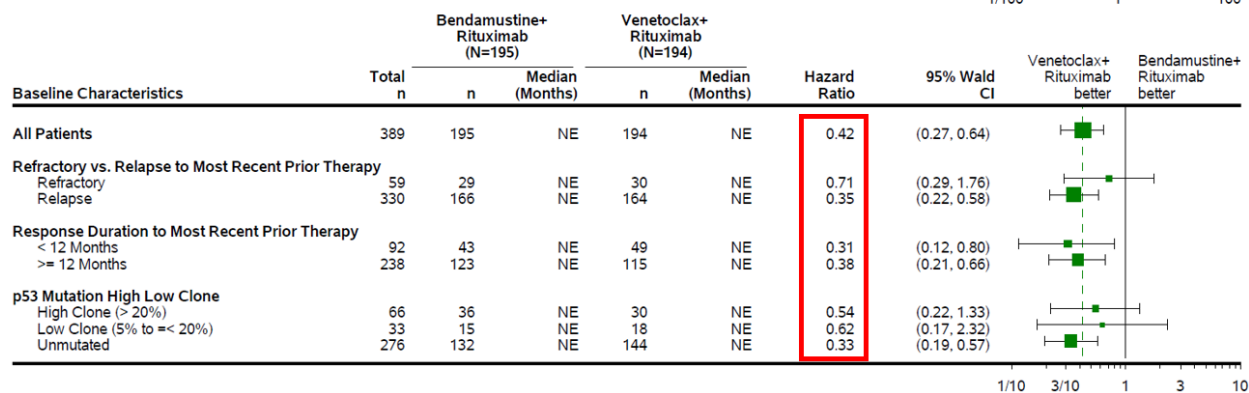

aCGH, array comparative genomic hybridization; CI, confidence interval; IgHV, immunoglobulin heavy chain gene; IvRS, interactive voice response system; NE, not estimable; OS, overall survival; yr, year.

**Supplemental Figure 5. Kaplan–Meier estimates by IGHV status amongst patients in the VenR arm.**

**(A) Investigator-assessed PFS from EOT in patients with uMRD status at EOT**

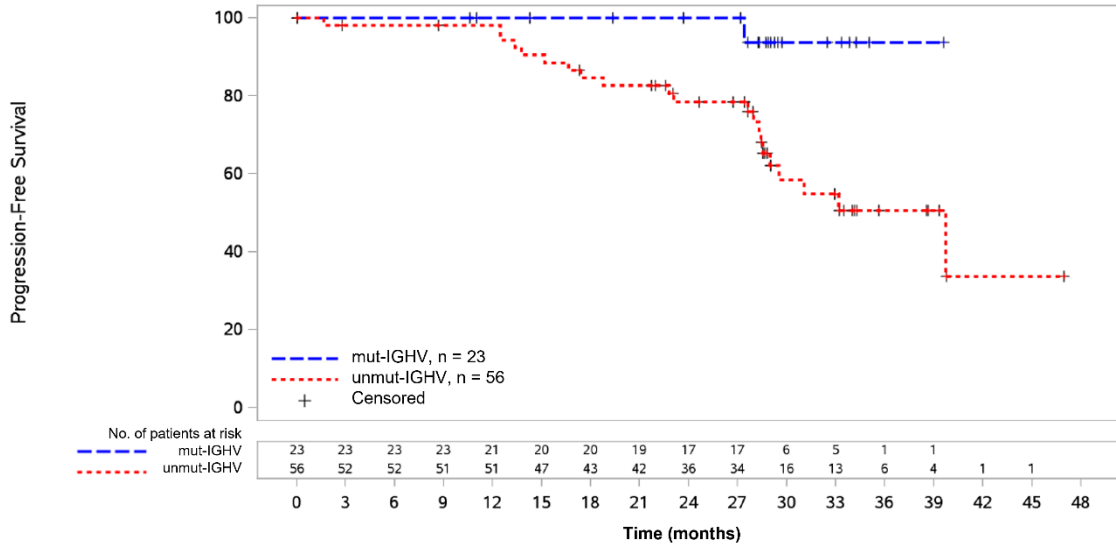

**(B) Time from EOT to MRD conversion in patients with uMRD status at EOT**

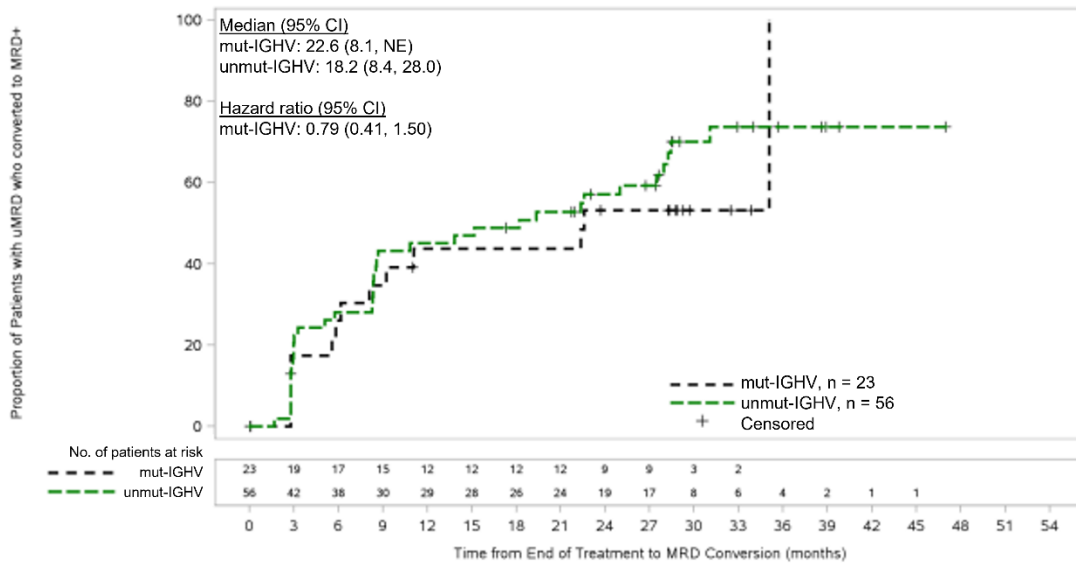



**(C) Time from MRD conversion to PFS event**

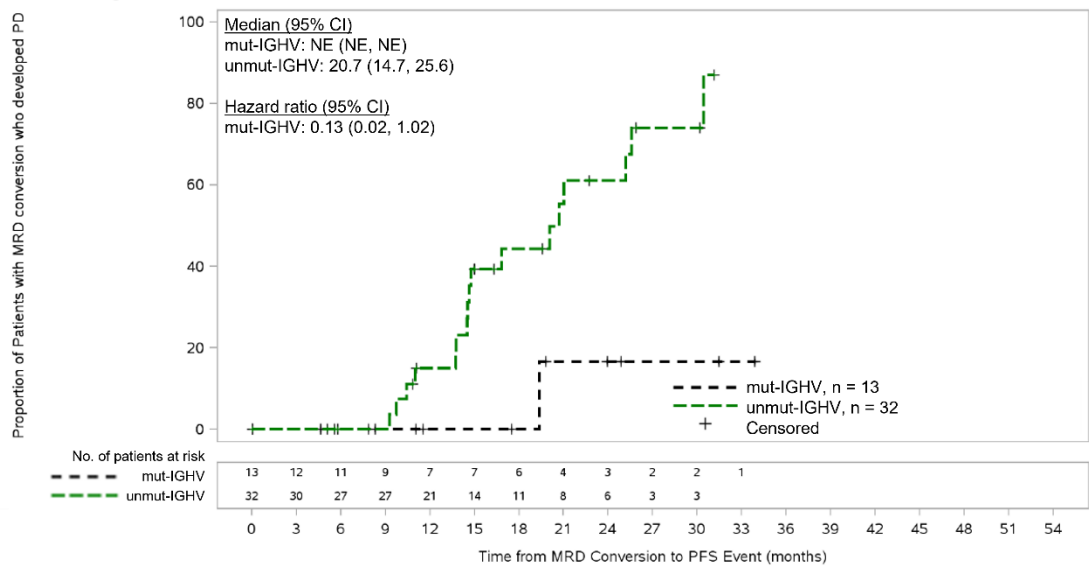

CI, confidence interval; EOT, end of treatment; IGHV, immunoglobulin heavy chain gene; MRD, minimal residual disease; mut, mutated; NE, not evaluable; PD, progressive disease; PFS, progression-free survival; uMRD, undetectable minimal residual disease; unmut, unmutated; VenR, venetoclax-rituximab.

**Supplemental Figure 6. MRD conversion plot by conversion/PD status (patients completing 2 years of VenR, with uMRD at EOT [n = 83]).**

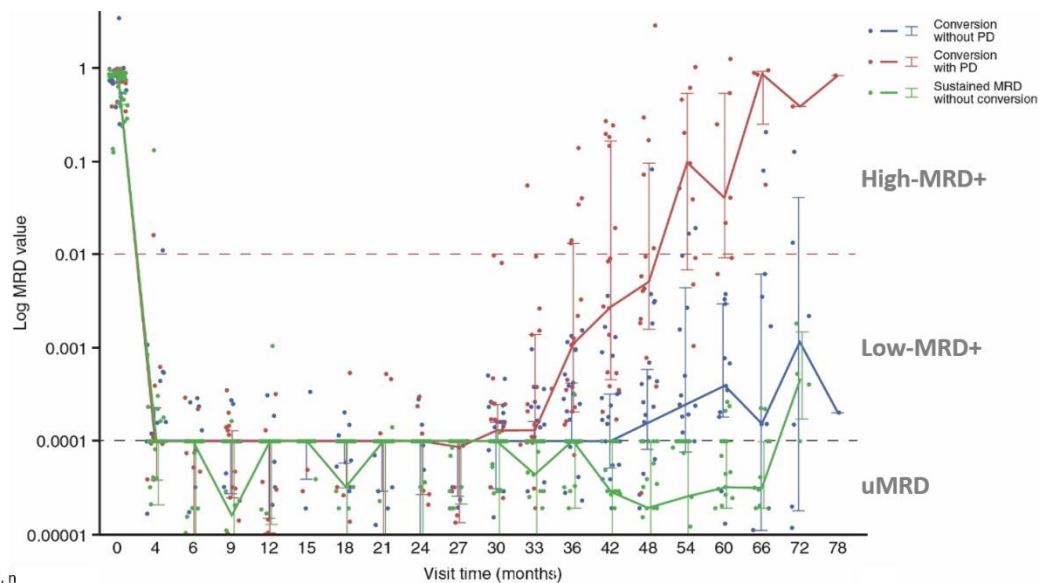

MRD conversion status, n

|                                  |    |    |    |    |    |    |    |    |    |    |    |    |    |    |    |    |    |    |    |   |
|----------------------------------|----|----|----|----|----|----|----|----|----|----|----|----|----|----|----|----|----|----|----|---|
| Conversion without PD            | 28 | 22 | 27 | 25 | 25 | 24 | 28 | 25 | 28 | 28 | 26 | 27 | 27 | 26 | 25 | 18 | 12 | 12 | 6  | 1 |
| Conversion with PD               | 19 | 18 | 18 | 19 | 19 | 19 | 19 | 18 | 19 | 19 | 19 | 18 | 19 | 17 | 14 | 9  | 7  | 4  | 1  | 1 |
| Sustained MRD without conversion | 32 | 29 | 31 | 32 | 30 | 27 | 31 | 31 | 30 | 32 | 31 | 29 | 27 | 23 | 22 | 16 | 19 | 11 | 4  |   |
| Total                            | 79 | 69 | 76 | 76 | 74 | 70 | 78 | 74 | 77 | 79 | 76 | 74 | 73 | 66 | 61 | 43 | 38 | 27 | 11 | 2 |

MRD shown as median and interquartile range. uMRD <1 CLL cell/10,000 leukocytes. EOT, end of treatment; MRD, minimal residual disease; PD, progressive disease; uMRD, undetectable minimal residual disease; VenR, venetoclax-rituximab.

## Supplemental Figure 7. Pre-EOT MRD levels for the 23 patients with low-MRD+ at EOT.

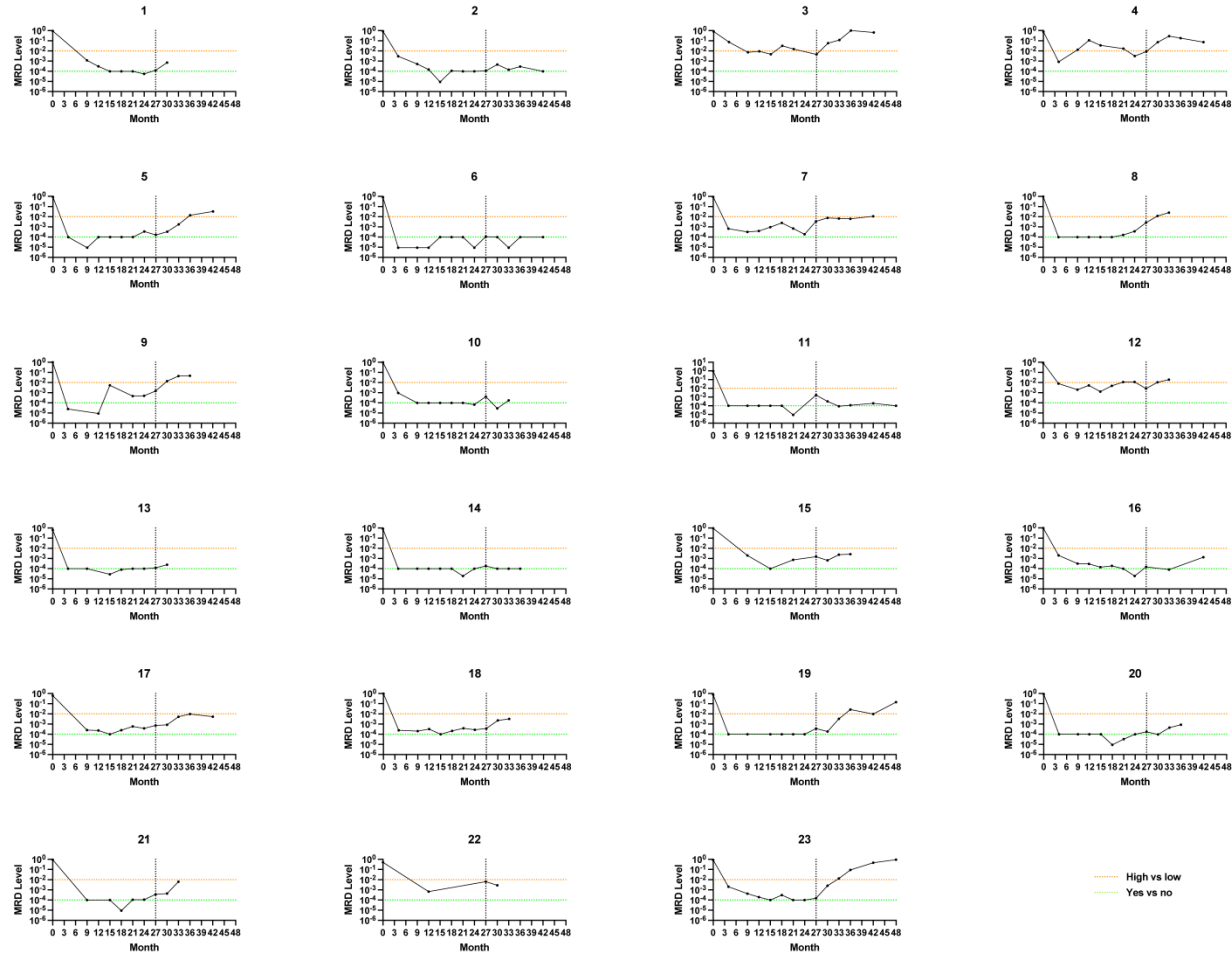

Green line represents threshold for uMRD status ( $<10^{-4}$ ); orange line represents threshold for low-MRD+ ( $\leq 10^{-4}$  to  $<10^{-2}$ ) to high-MRD+ ( $\geq 10^{-2}$ ). EOT, end of treatment; MRD, minimal residual disease.
